# Supplementary material for: Plant Availability of Magnesium in Typical Tea Plantation Soils&nbsp;
Source: Research Square preprint supplement (doi:10.21203/rs.3.rs-117886/v1), 2020-12-04
Supplement: Supplementary file 1 [file f21f7e6bbb6cd1765062b529.docx]

Table S1 information of soil samples from 12 tea plantations in China.

| **ID** | **Site** | **Province** | **Location** |
| --- | --- | --- | --- |
| **CD** | ChengDu | Sichuan | 30.22 N, 103.60 E |
| **GL** | GuiLing | Guangxi | 25.06 N, 110.30 E |
| **HG** | HuangGang | Hubei | 30.50 N, 115.16 E |
| **XY** | XinYang | Henan | 32.34 N, 114.43 E |
| **XSBN** | XiShuangBanNa | Yunnan | 22.14 N, 100.82 E |
| **WX** | WuXi | Jiangshu | 31.36 N, 120.39 E |
| **YC** | YiChang | Hubei | 30.92 N, 111.05 E |
| **CS** | ChangSha | Hunan | 28.31 N, 112.69 E |
| **ND** | NingDe | Fujian | 26.69 N, 119.49 E |
| **QY** | QingYuan | Guangdong | 23.68 N, 113.05 E |
| **XX** | XiangXi | Hunan | 28.14 N, 109.73 E |
| **CQ** | ChongQing | Chongqing | 29.45 N, 106.73 E |
